# Supplementary material for: A novel approach reveals that HLA class 1 single antigen bead-signatures provide a means of high-accuracy pre-transplant risk assessment of acute cellular rejection in renal transplantation
Source: PubMed Central journal article supplement (PMC6486998; doi:10.1186/s12865-019-0291-2), 2019-04-27

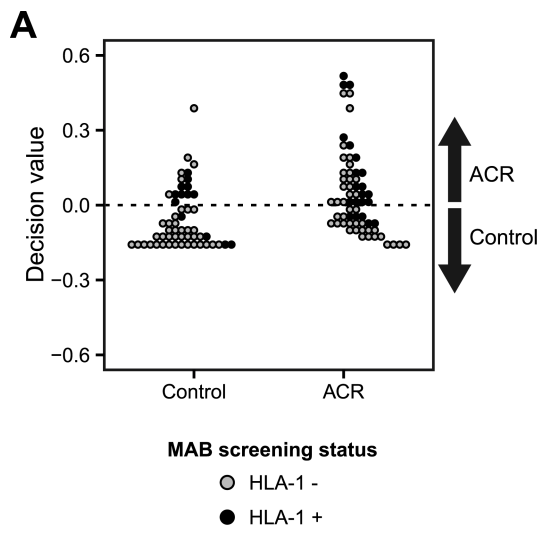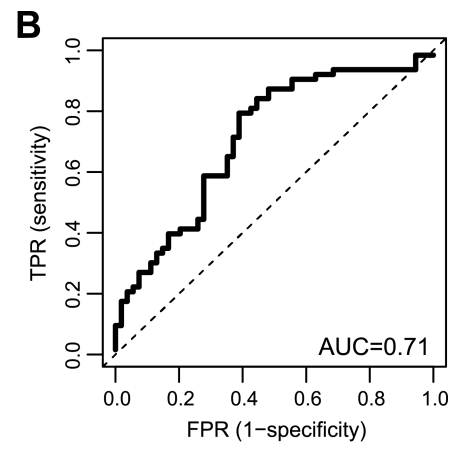

Supplement: 12865_2019_291_MOESM3_ESM.pdf [file 12865_2019_291_MOESM3_ESM.pdf]
